# Supplementary material for: Organophosphorus-catalyzed diaza-Wittig reaction: application to the synthesis of pyridazines
Source: Royal Society of Chemistry journal article supplement (doi:10.1039/c4ob01201a), 2014-01-01

## Supporting Information

### Organophosphorus-catalyzed Diaza-Wittig reaction: Application to the synthesis of pyridazines

Hassen Bel Abed,<sup>a</sup> Oscar Mammoliti,<sup>b</sup> Omprakash Bande,<sup>a</sup> Guy Van Lommen<sup>b</sup> and Piet Herdewijn<sup>\*a</sup>

<sup>a</sup>Rega Institute for Medical Research, Katholieke Universiteit Leuven, Minderbroedersstraat 10, B-3000 Leuven, Belgium

<sup>b</sup>Galapagos NV, Laboratory of Medicinal Chemistry, Generaal De Wittelaan L11 A3, B-2800 Mechelen, Belgium

#### Table of Contents

##### *<sup>1</sup>H and <sup>13</sup>C NMR spectra*

|                                                                                                             |     |
|-------------------------------------------------------------------------------------------------------------|-----|
| <sup>1</sup> H and <sup>13</sup> C NMR spectra for methyl 2-diazo-3-oxobutanoate                            | S2  |
| <sup>1</sup> H and <sup>13</sup> C NMR spectra for methyl 2-diazo-3-oxopentanoate                           | S3  |
| <sup>1</sup> H and <sup>13</sup> C NMR spectra for 2-Diazo-1-phenylbutane-1,3-dione                         | S4  |
| <sup>1</sup> H and <sup>13</sup> C NMR spectra for <b>1e</b>                                                | S5  |
| <sup>1</sup> H and <sup>13</sup> C NMR spectra for <b>1f</b>                                                | S6  |
| <sup>1</sup> H and <sup>13</sup> C NMR spectra for <b>1h</b>                                                | S7  |
| <sup>1</sup> H and <sup>13</sup> C NMR spectra for <b>1i</b>                                                | S8  |
| <sup>1</sup> H and <sup>13</sup> C NMR spectra for <b>1j</b>                                                | S9  |
| <sup>1</sup> H and <sup>13</sup> C NMR spectra for 4-hydroxy-1-phenylsulfonyl-4-(thiophene-2-yl)-2-butanone | S10 |
| <sup>1</sup> H and <sup>13</sup> C NMR spectra for <b>2e</b>                                                | S11 |
| <sup>1</sup> H and <sup>13</sup> C NMR spectra for <b>2f</b>                                                | S12 |
| <sup>1</sup> H and <sup>13</sup> C NMR spectra for <b>2g</b>                                                | S13 |
| <sup>1</sup> H and <sup>13</sup> C NMR spectra for <b>2h</b>                                                | S14 |
| <sup>1</sup> H and <sup>13</sup> C NMR spectra for <b>2i</b>                                                | S15 |
| <sup>1</sup> H and <sup>13</sup> C NMR spectra for <b>2j</b>                                                | S16 |
| <sup>1</sup> H and <sup>13</sup> C NMR spectra for <b>2n</b>                                                | S17 |

##### *LC/MS analysis*

|                                |        |
|--------------------------------|--------|
| LC/MS analysis for <b>2a-o</b> | S18-25 |
|--------------------------------|--------|

# <sup>1</sup>H AND <sup>13</sup>C NMR SPECTRA

Methyl 2-diazo-3-oxobutanoate proton spectrum (500 MHz) in DMSO-d6

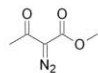

Methyl 2-diazo-3-oxobutanoate

3.774  
3.312  
2.502  
2.377

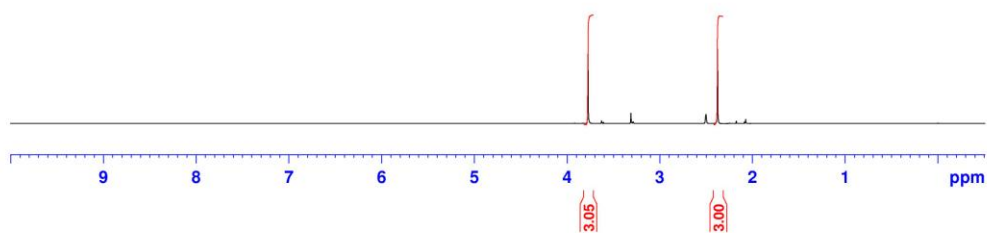

Methyl 2-diazo-3-oxobutanoate carbon spectrum (125 MHz) in DMSO-d6

189.27

161.48

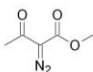

Methyl 2-diazo-3-oxobutanoate

52.26

27.91

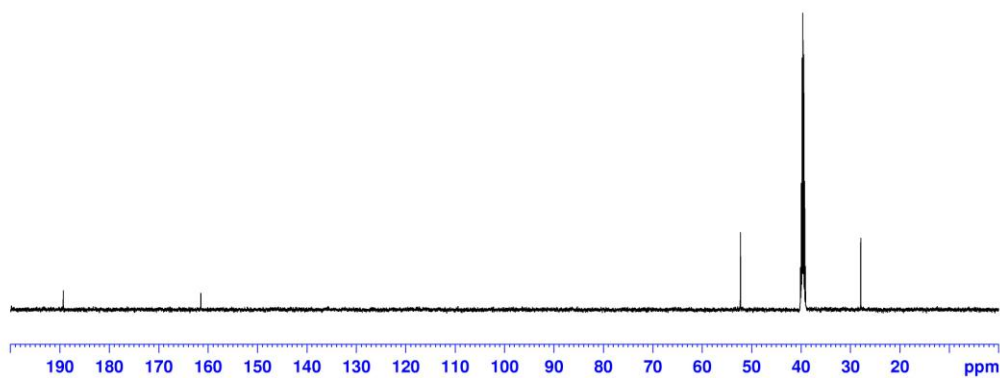

Methyl 2-diazo-3-oxopentanoate carbon spectrum (300 MHz) in DMSO-d6

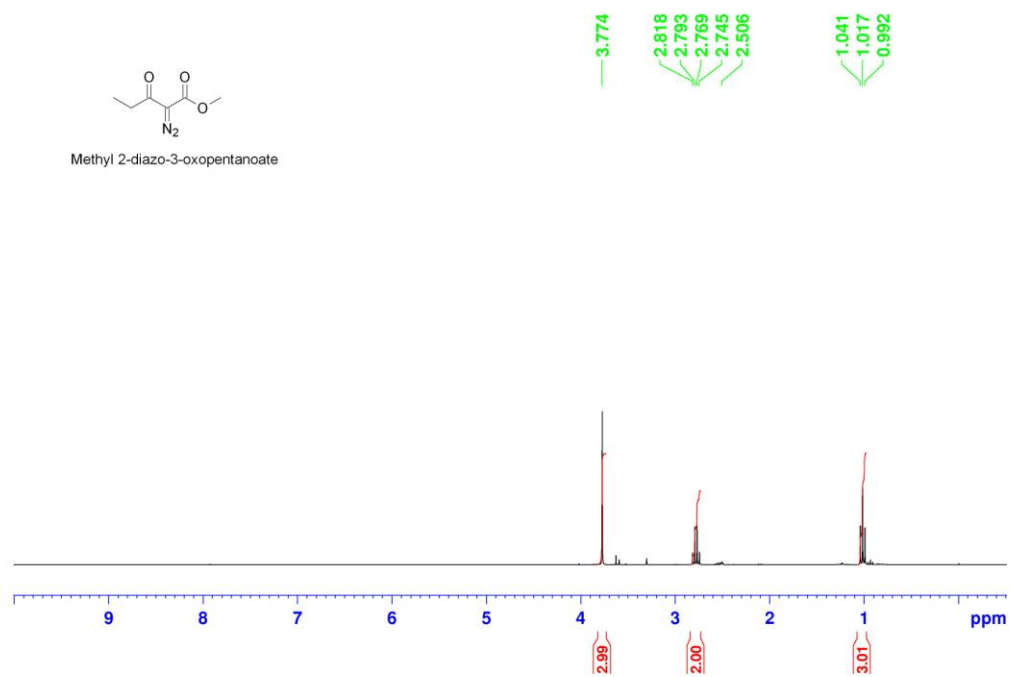

Methyl 2-diazo-3-oxopentanoate carbon spectrum (75 MHz) in DMSO-d6

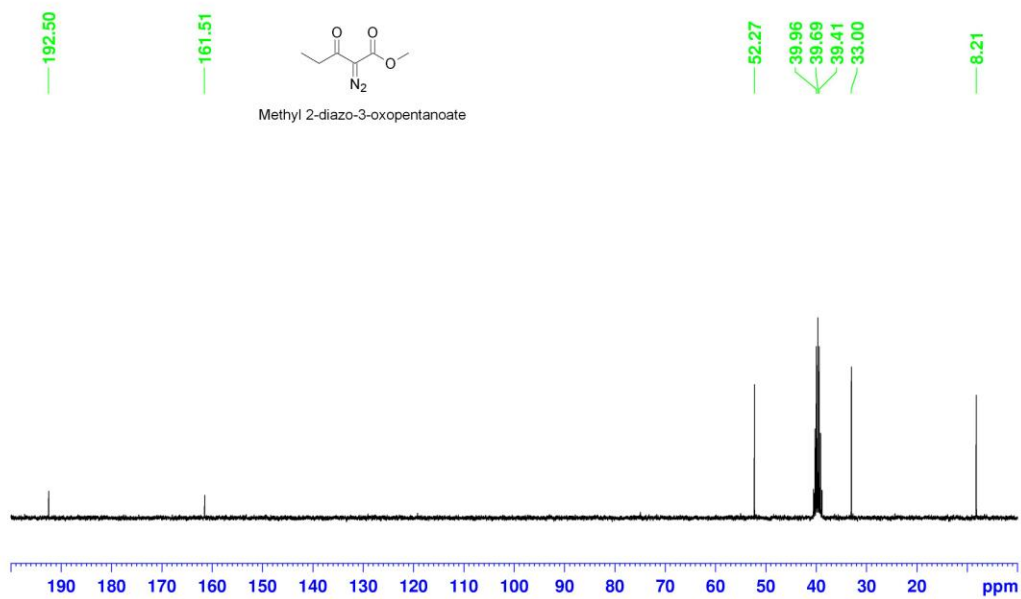

3-diazo-(phenyl)-butan-2,4-dione proton spectrum (500 MHz) in DMSO-d6

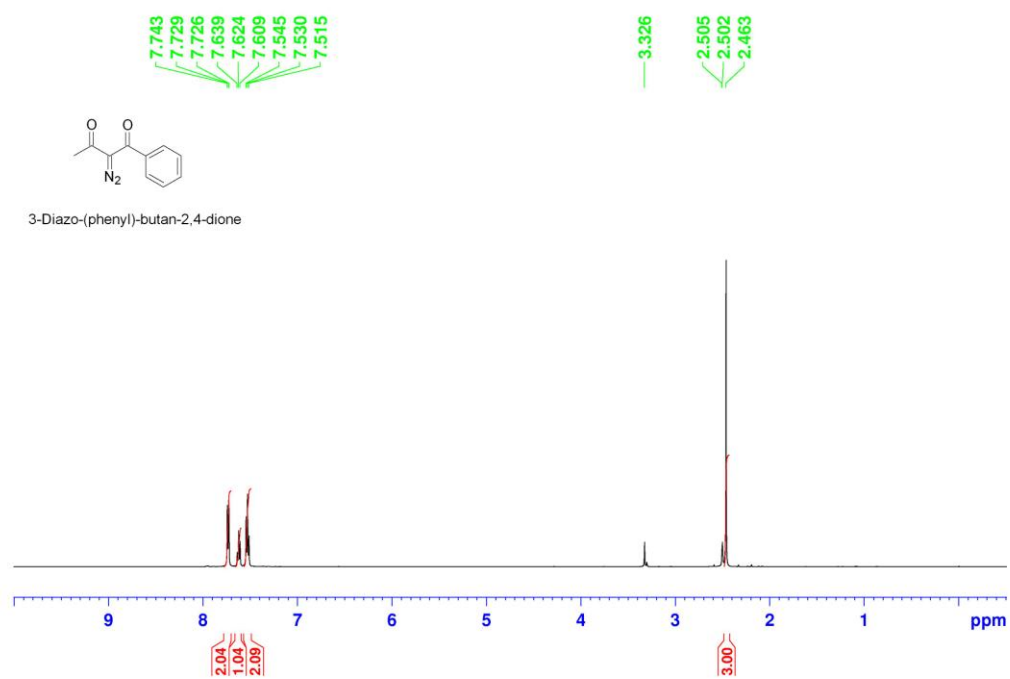

3-diazo-(phenyl)-butan-2,4-dione carbon spectrum (125 MHz) in DMSO-d6

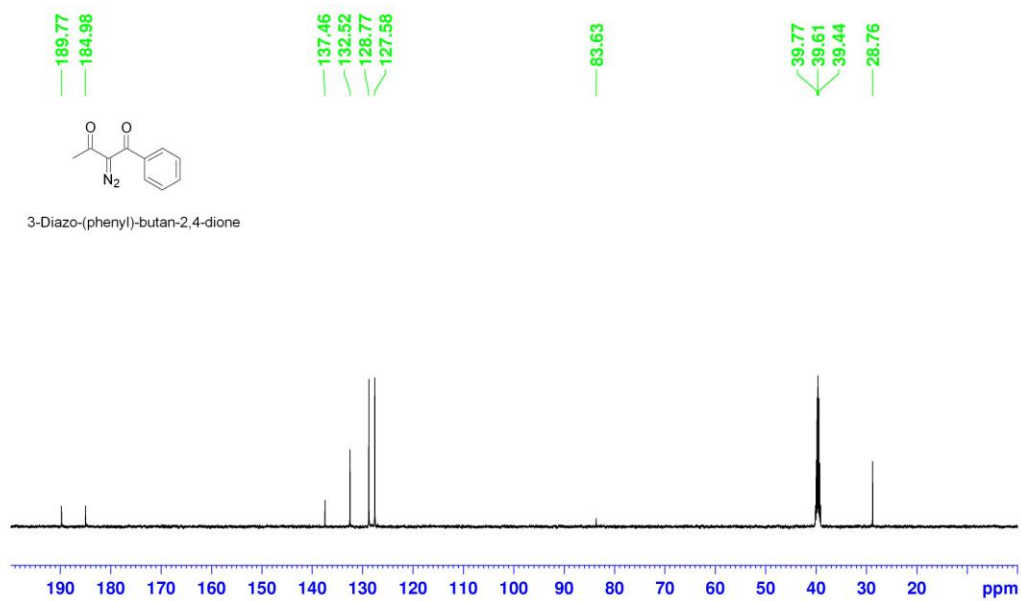

1e proton spectrum (300 MHz) in DMSO-d6

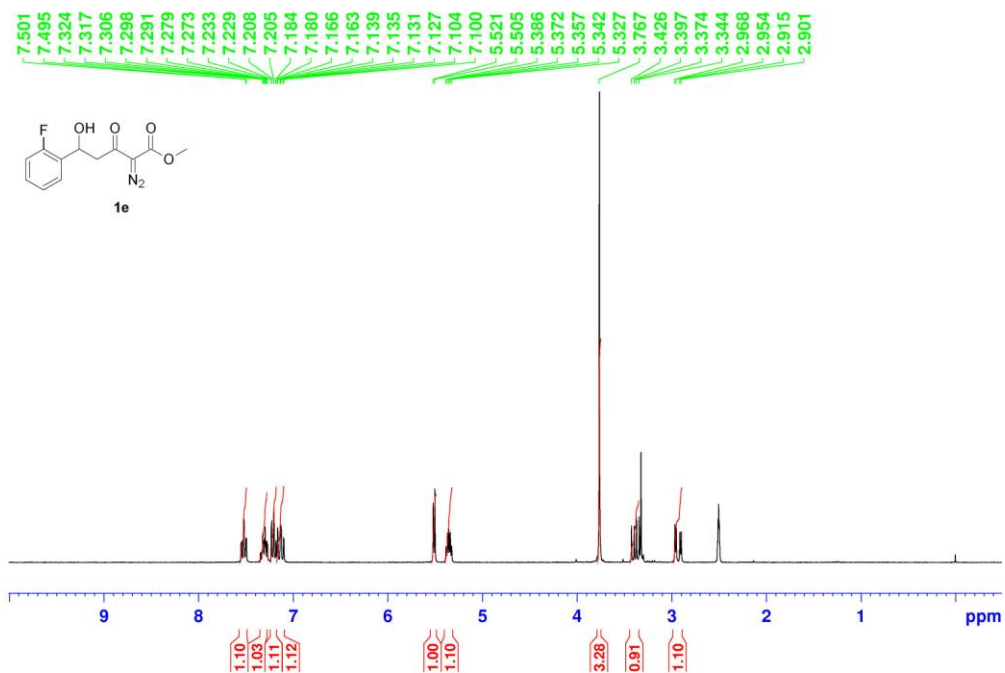

1e carbon spectrum (75 MHz) in DMSO-d6

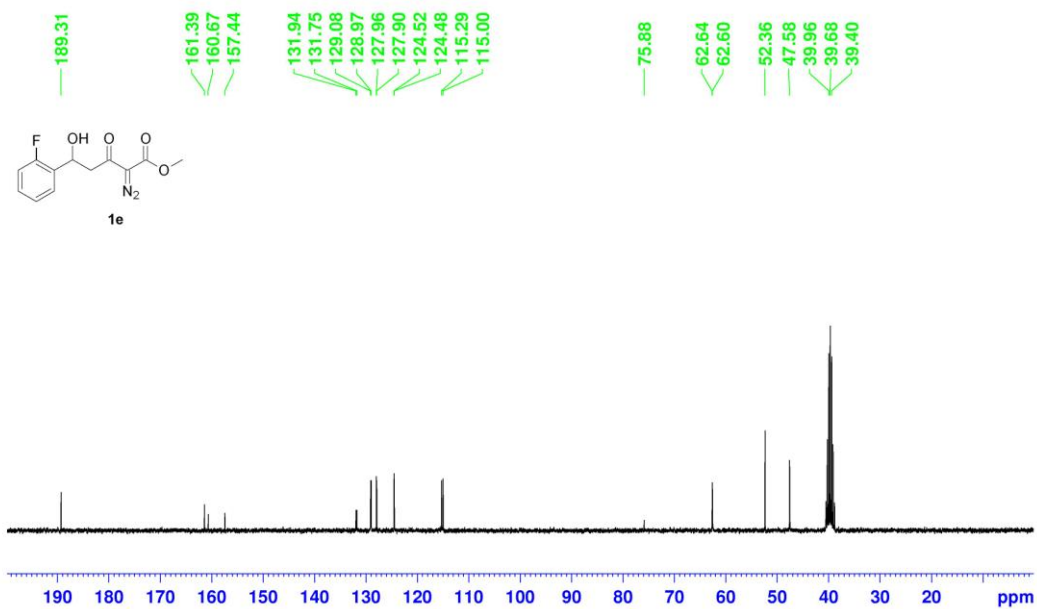

1f proton spectrum (300 MHz) in DMSO-d6

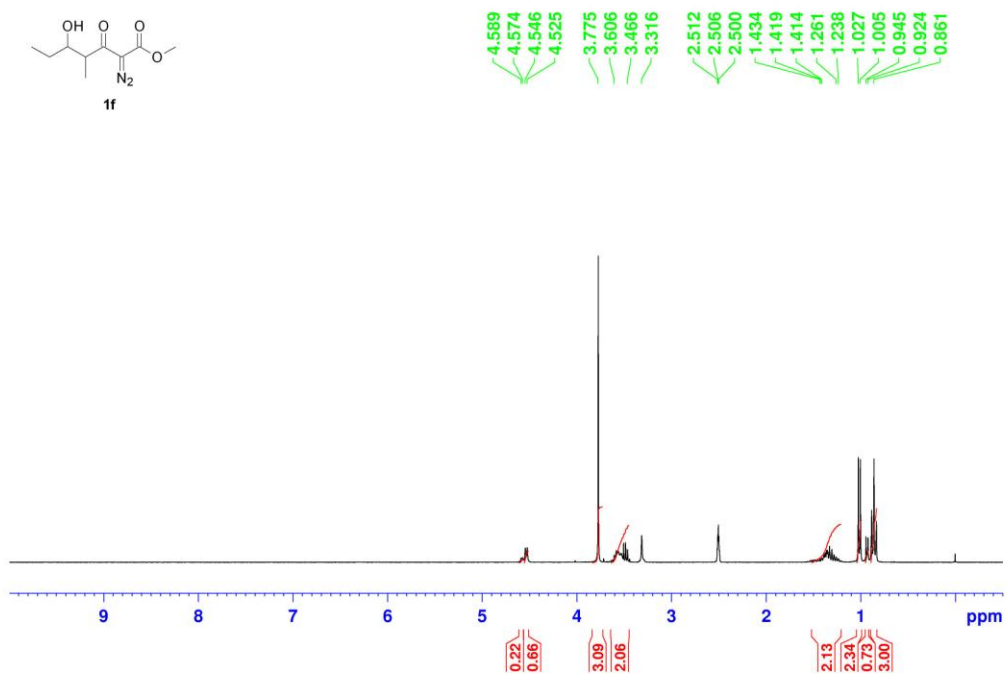

1f carbon spectrum (75 MHz) in DMSO-d6

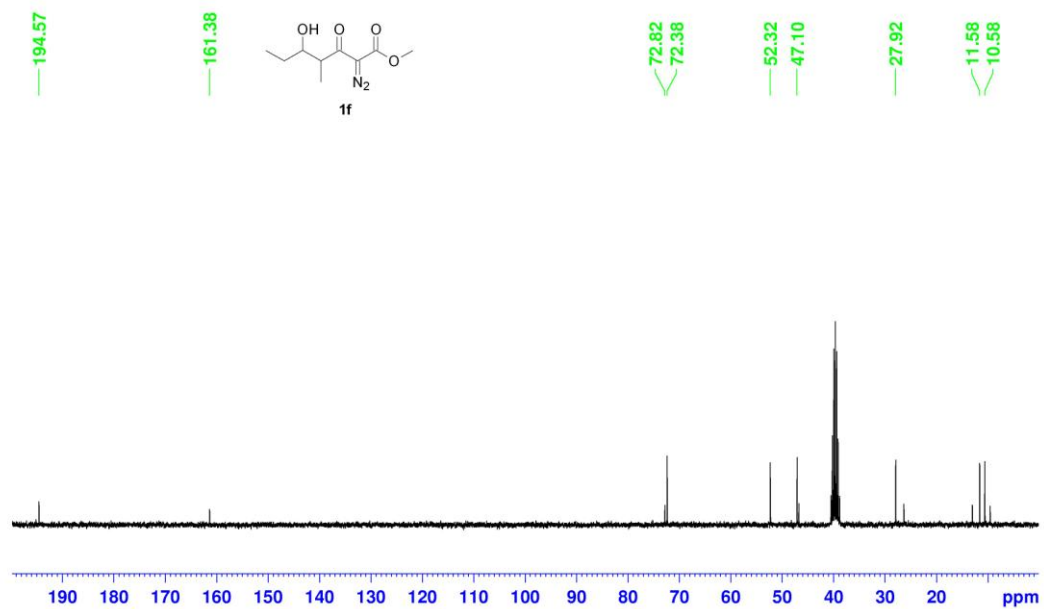

1h proton spectrum (300 MHz) in DMSO-d6

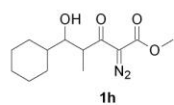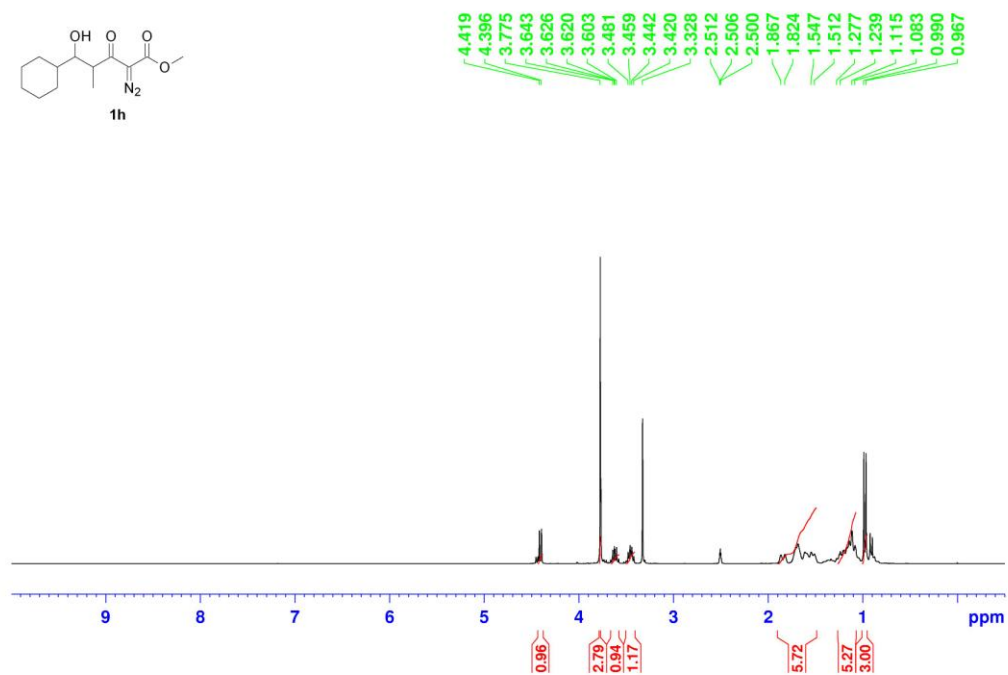

1h carbon spectrum (75 MHz) in DMSO-d6

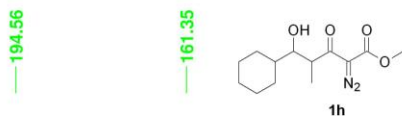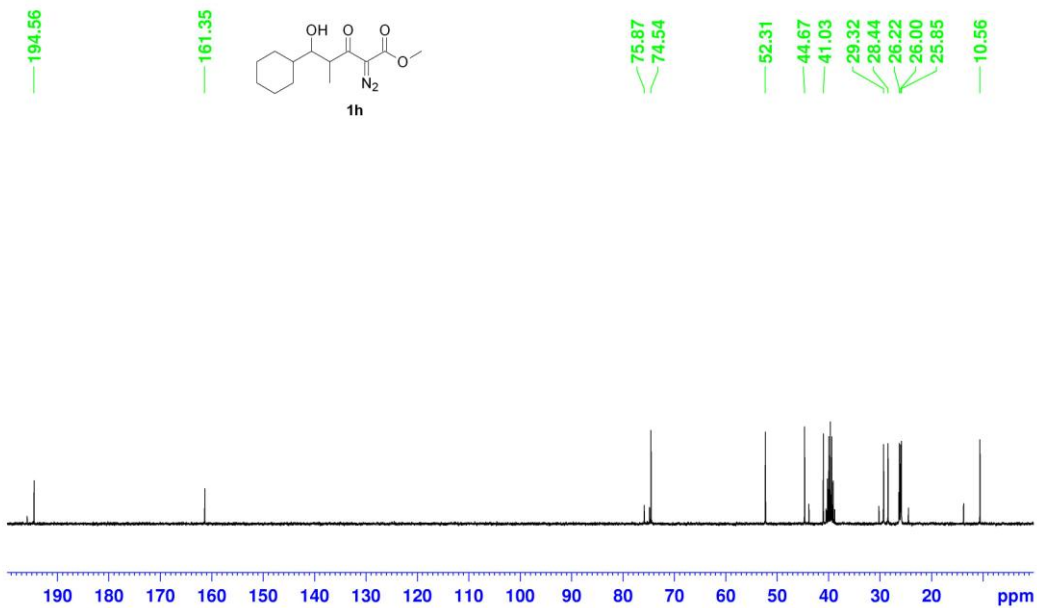

1i proton spectrum (300 MHz) in DMSO-d6

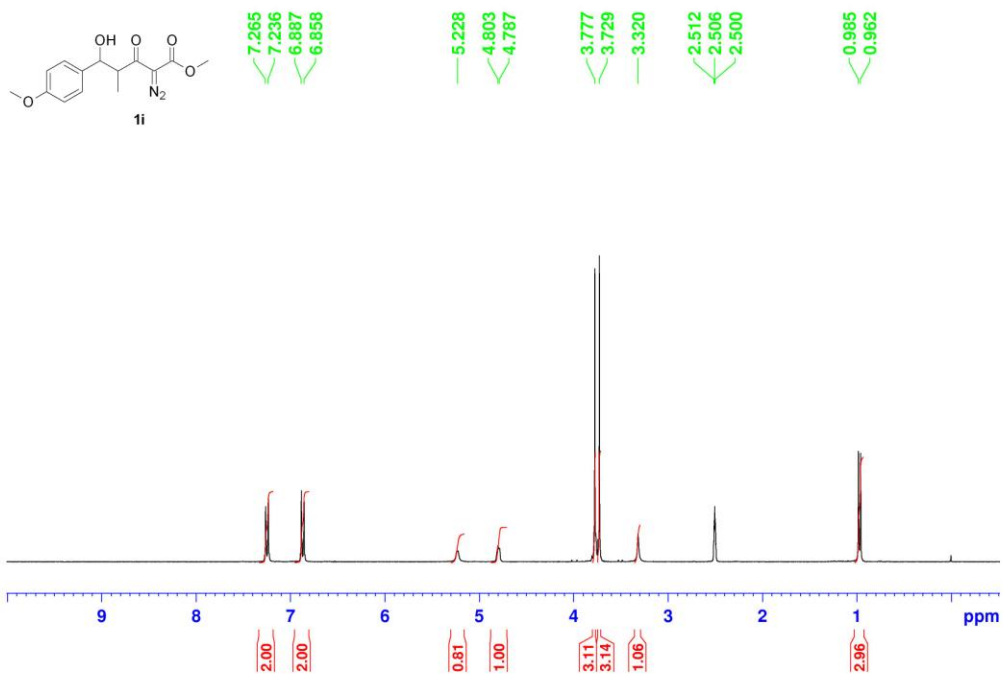

1i carbon spectrum (75 MHz) in DMSO-d6

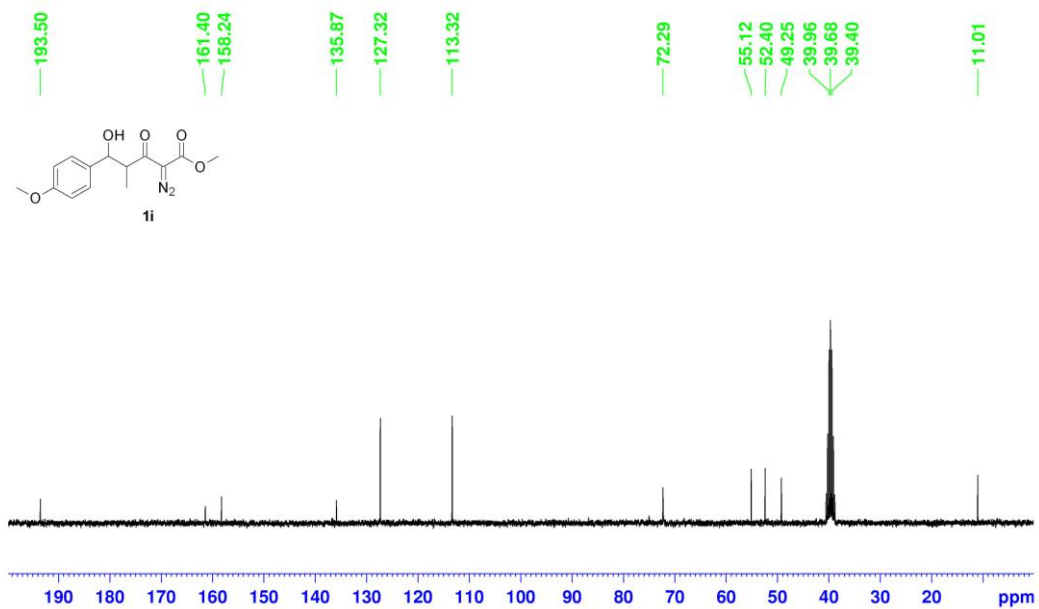



1j proton spectrum (300 MHz) in DMSO-d6

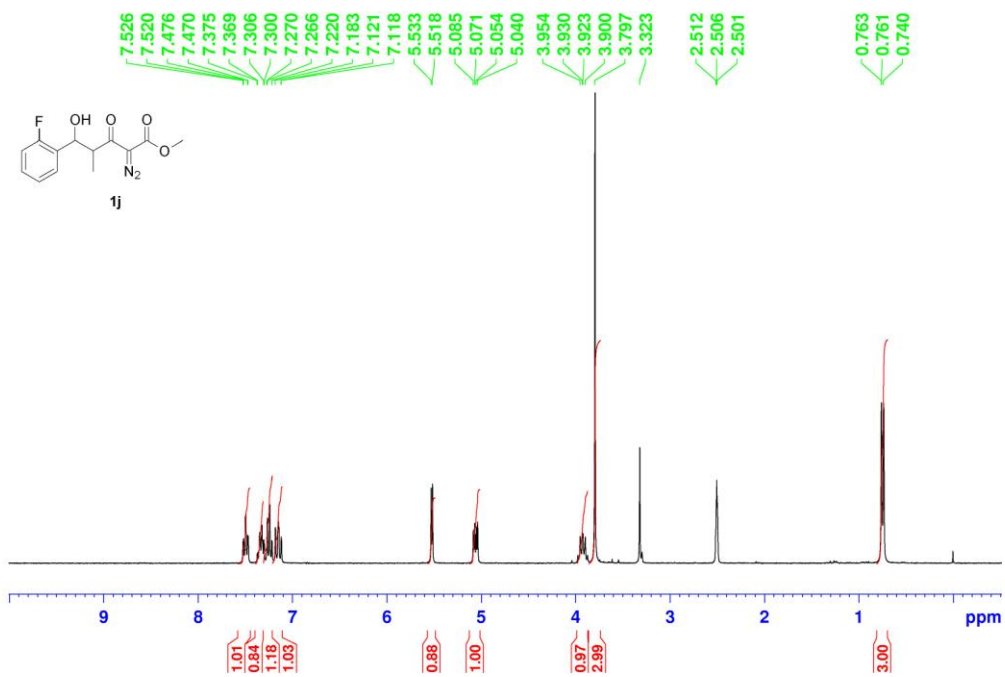

1j carbon spectrum (75 MHz) in DMSO-d6

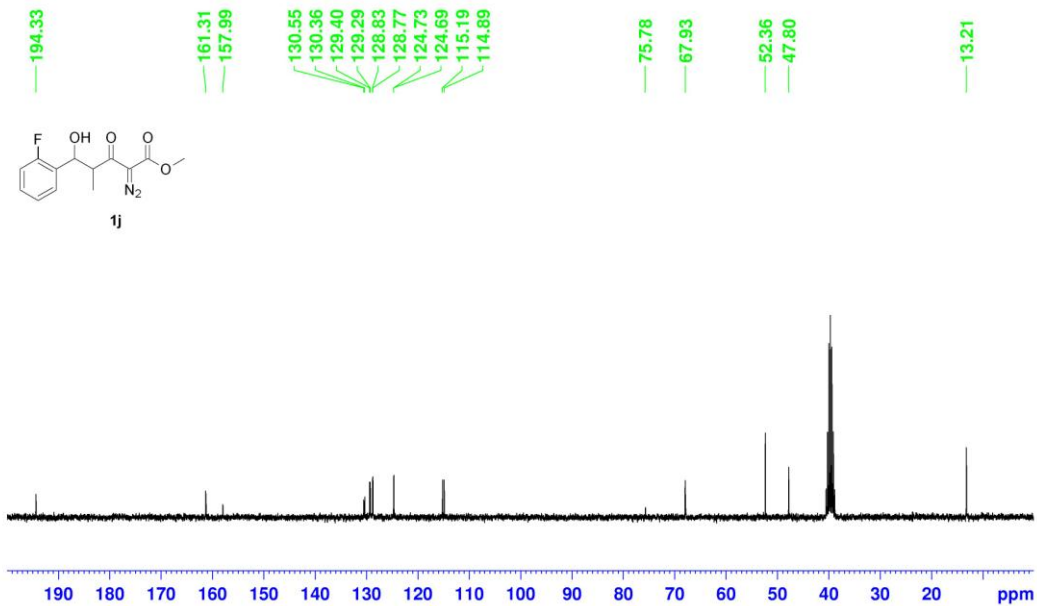

4-hydroxy-1-phenylsulfonyl-4-(thiophene-2-yl)-2-butanone proton spectrum (500 MHz) in DMSO-d6

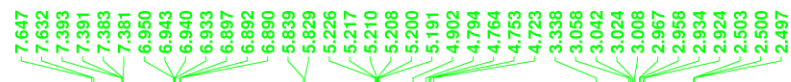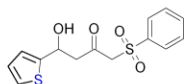

4-hydroxy-1-phenylsulfonyl-4-(thiophene-2-yl)-2-butanone

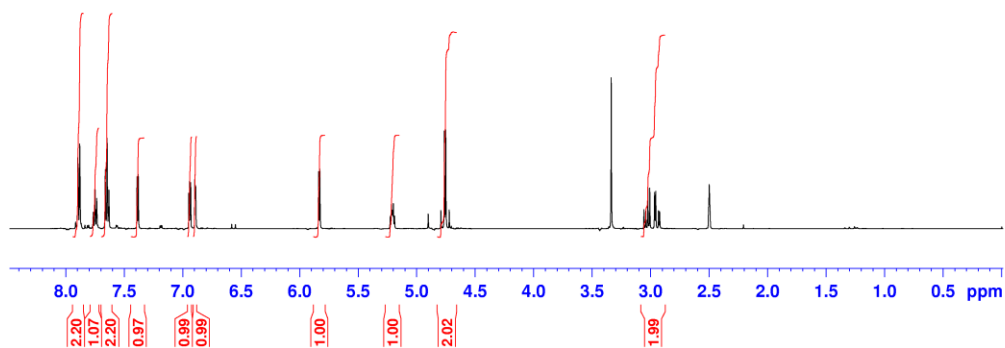

4-hydroxy-1-phenylsulfonyl-4-(thiophene-2-yl)-2-butanone carbon spectrum (125 MHz) in DMSO-d6

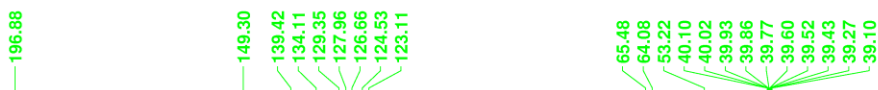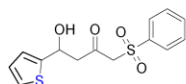

4-hydroxy-1-phenylsulfonyl-4-(thiophene-2-yl)-2-butanone

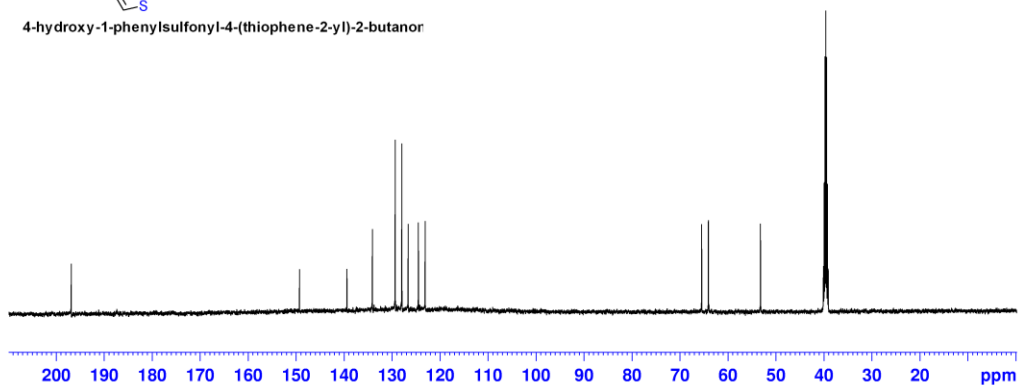

2e proton spectrum (300 MHz) in DMSO-d6

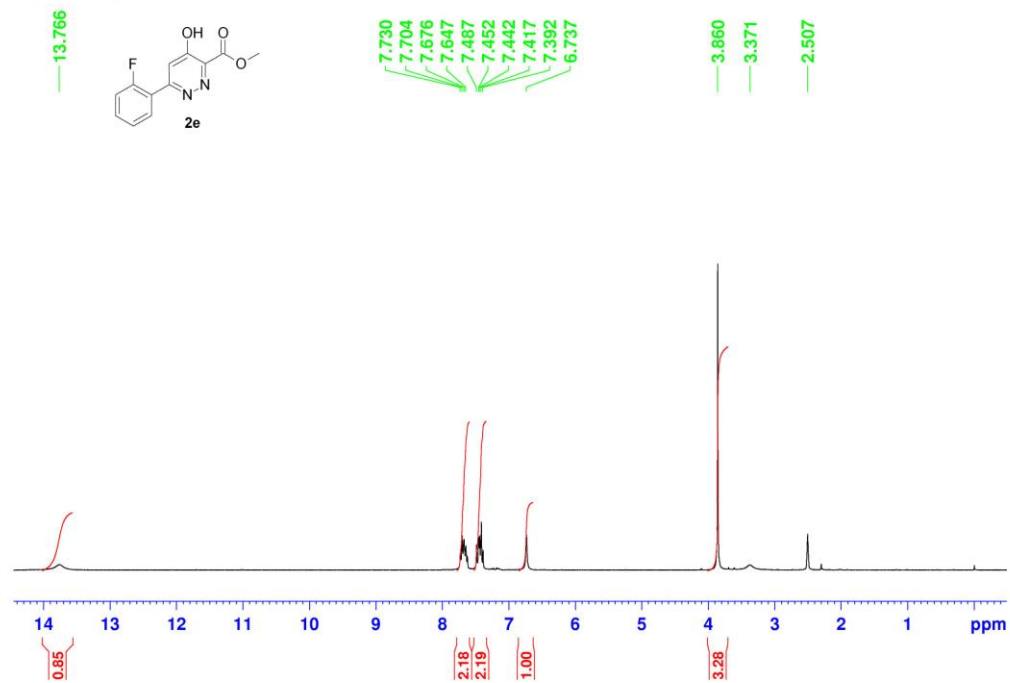

2e carbon spectrum (75 MHz) in DMSO-d6

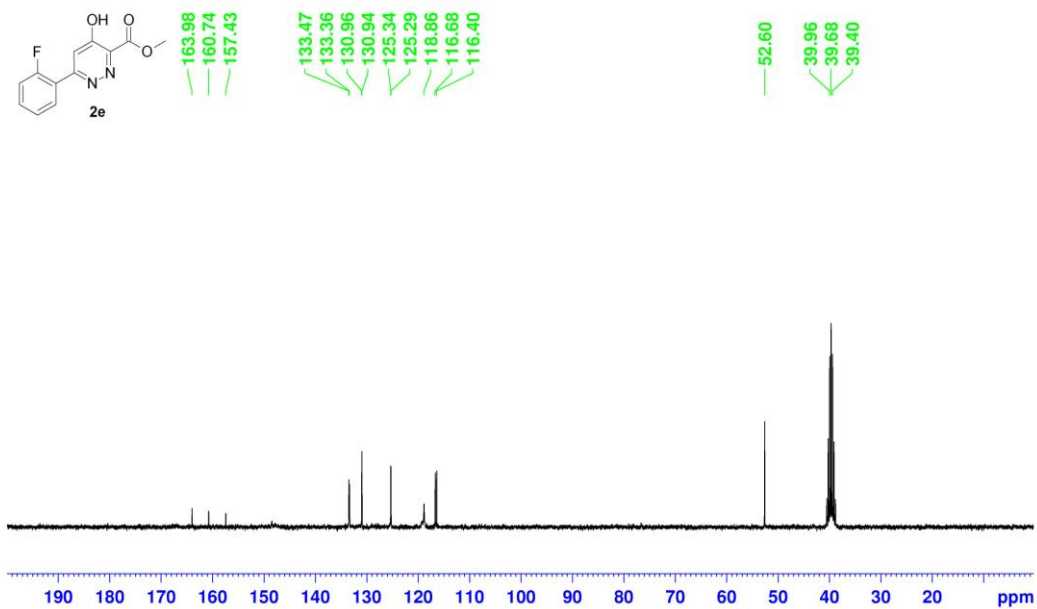

2f proton spectrum (300 MHz) in DMSO-d6

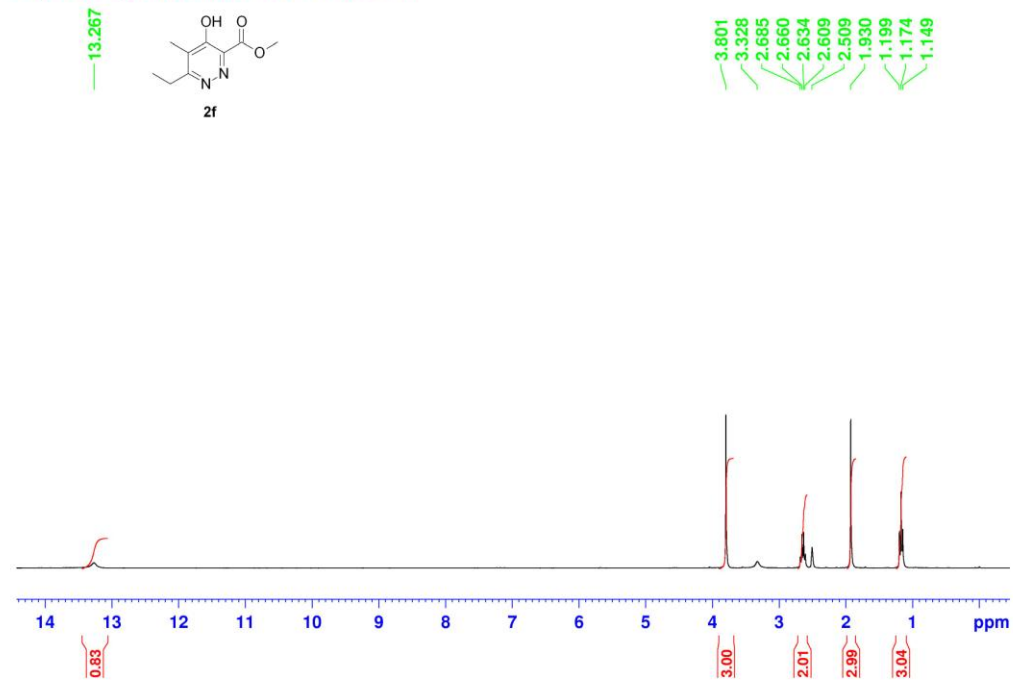

2f carbon spectrum (75 MHz) in DMSO-d6

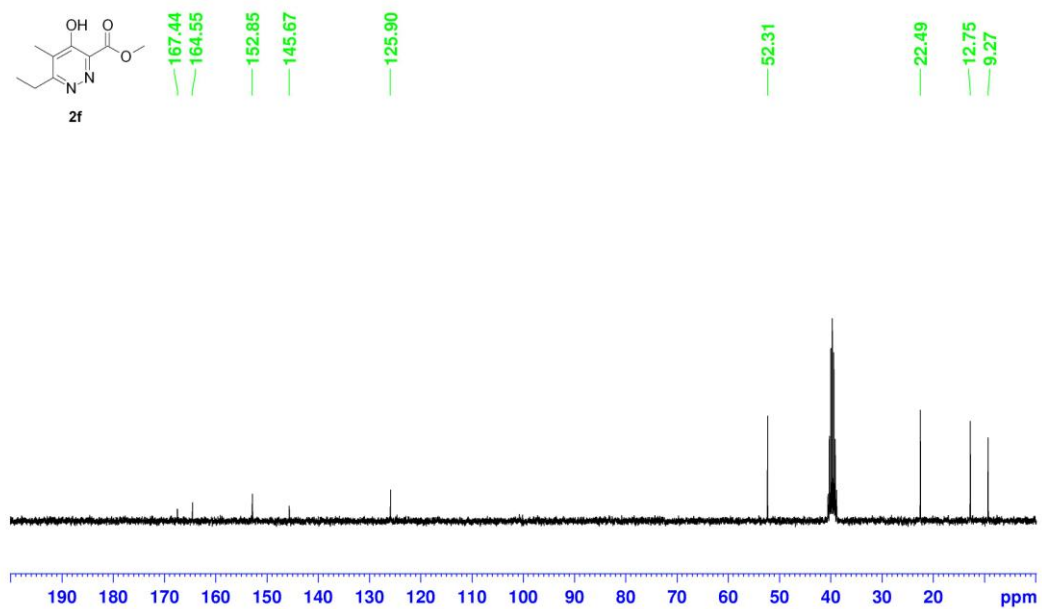

2g proton spectrum (300 MHz) in DMSO-d6

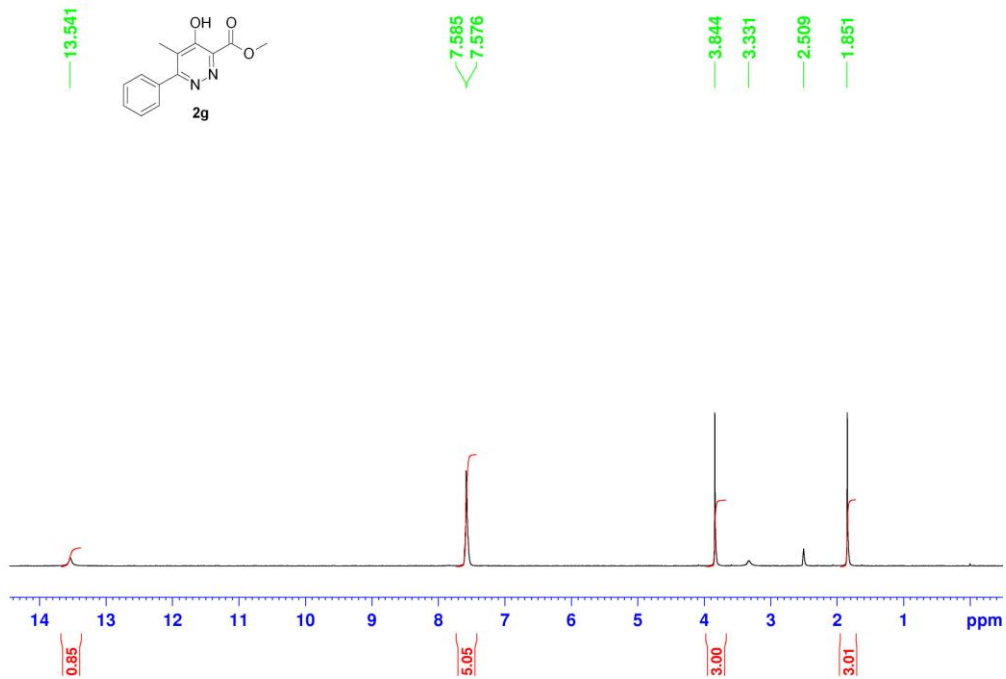

2g carbon spectrum (75 MHz) in DMSO-d6

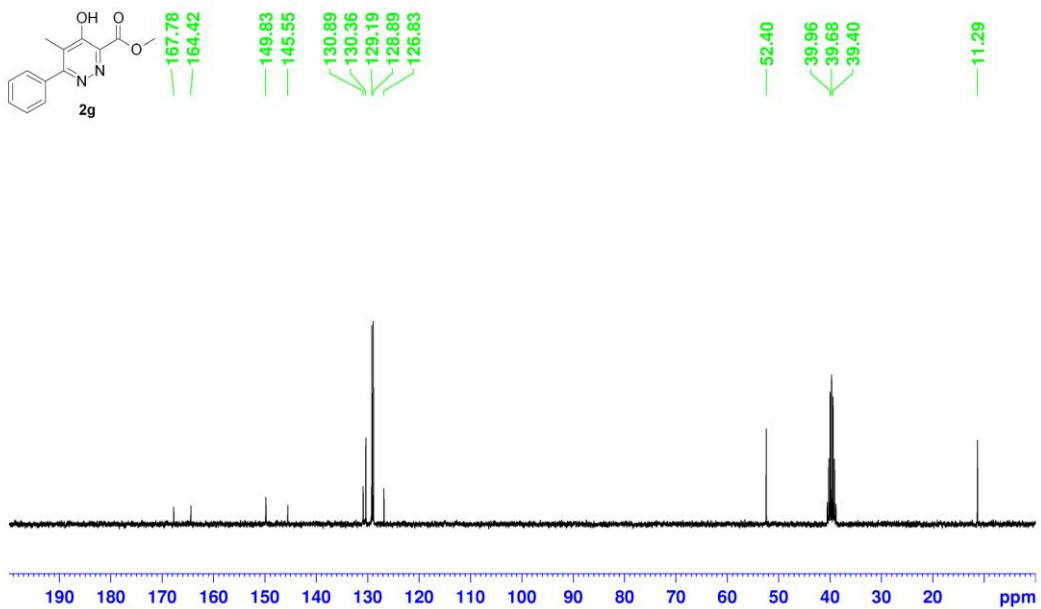

2h proton spectrum (300 MHz) in DMSO-d6

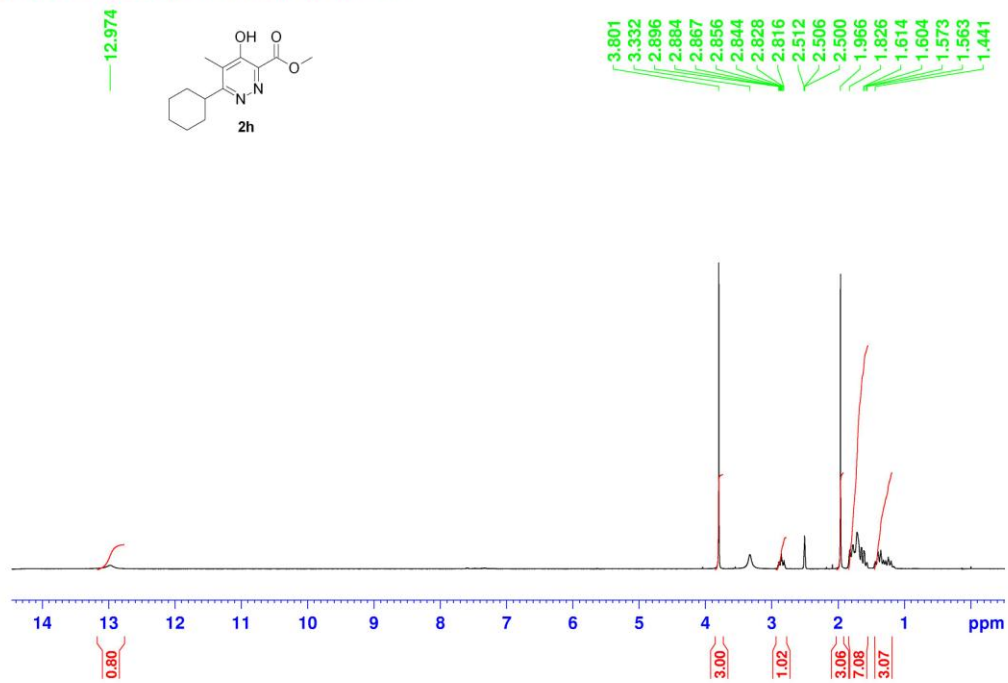

2h carbon spectrum (75 MHz) in DMSO-d6

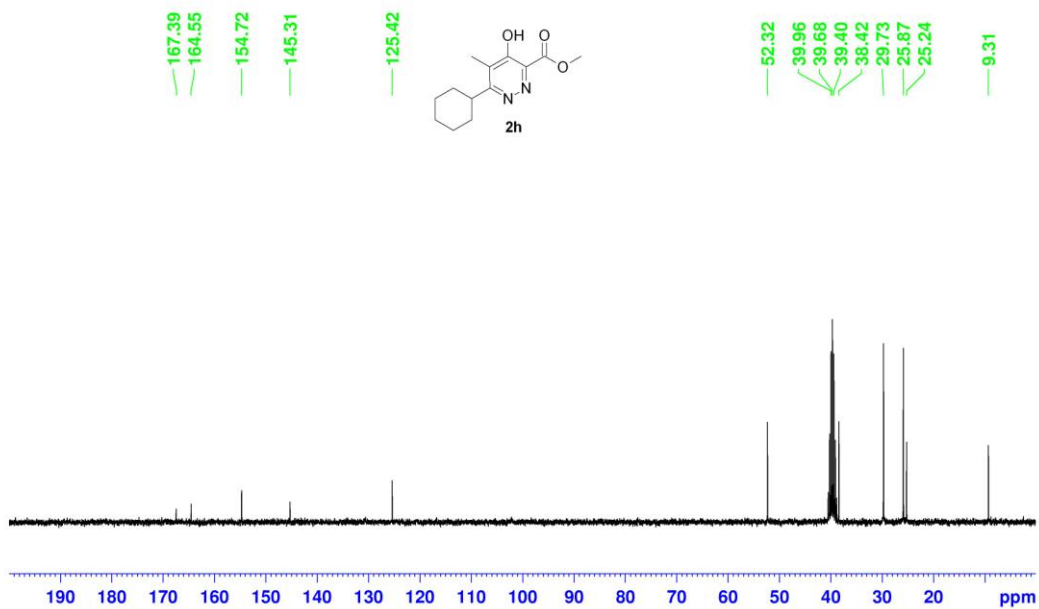

2i proton spectrum (600 MHz) in DMSO-d6

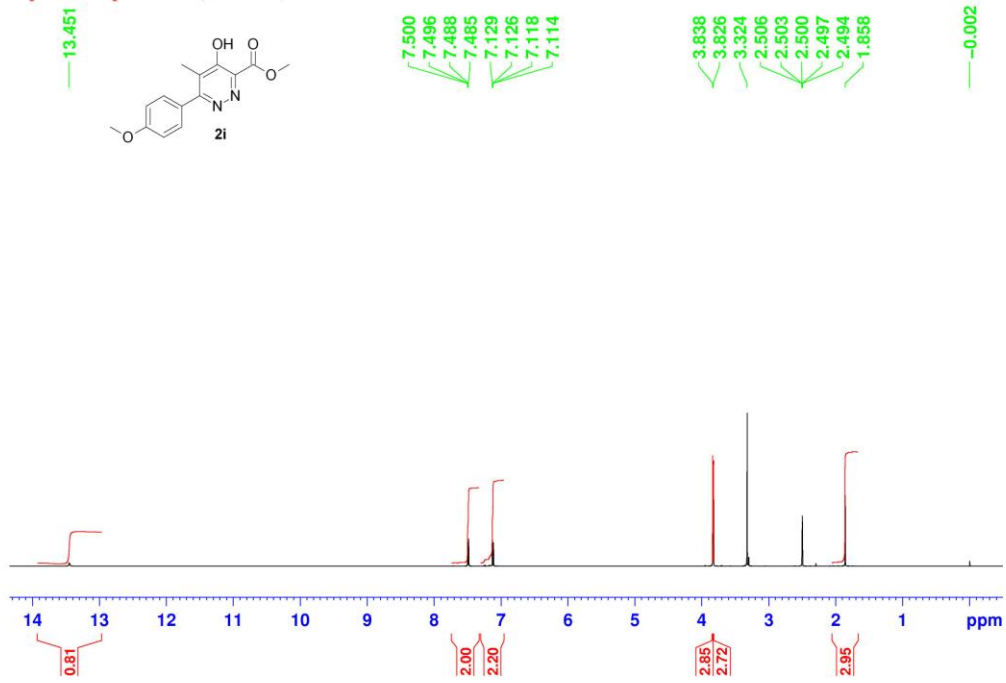

2i carbon spectrum (150 MHz) in DMSO-d6

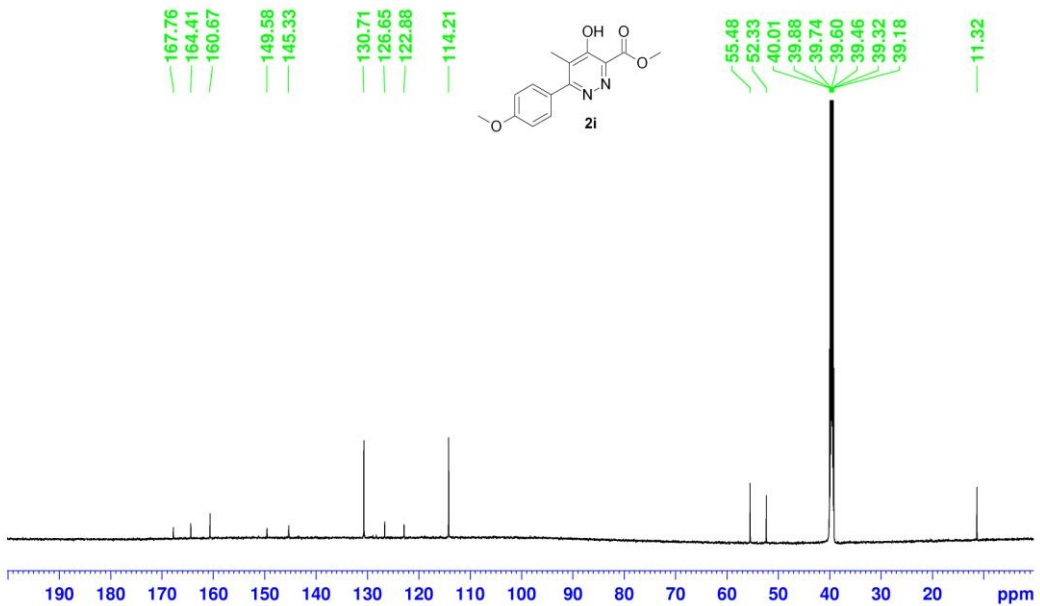

2j proton spectrum (300 MHz) in DMSO-d6

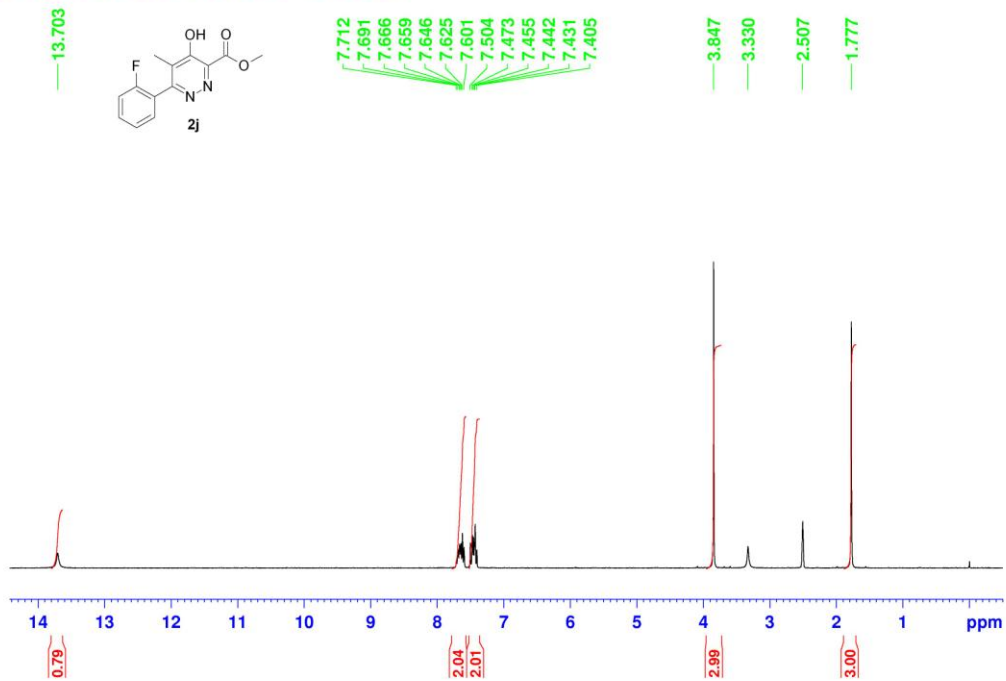

2j carbon spectrum (75 MHz) in DMSO-d6

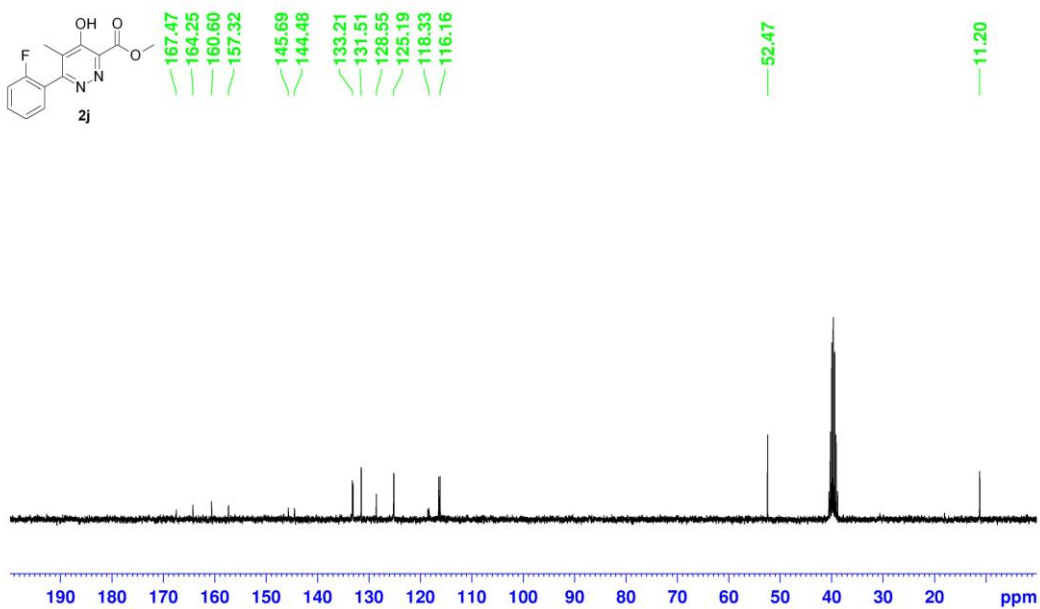



2n proton spectrum (500 MHz) in DMSO-d6

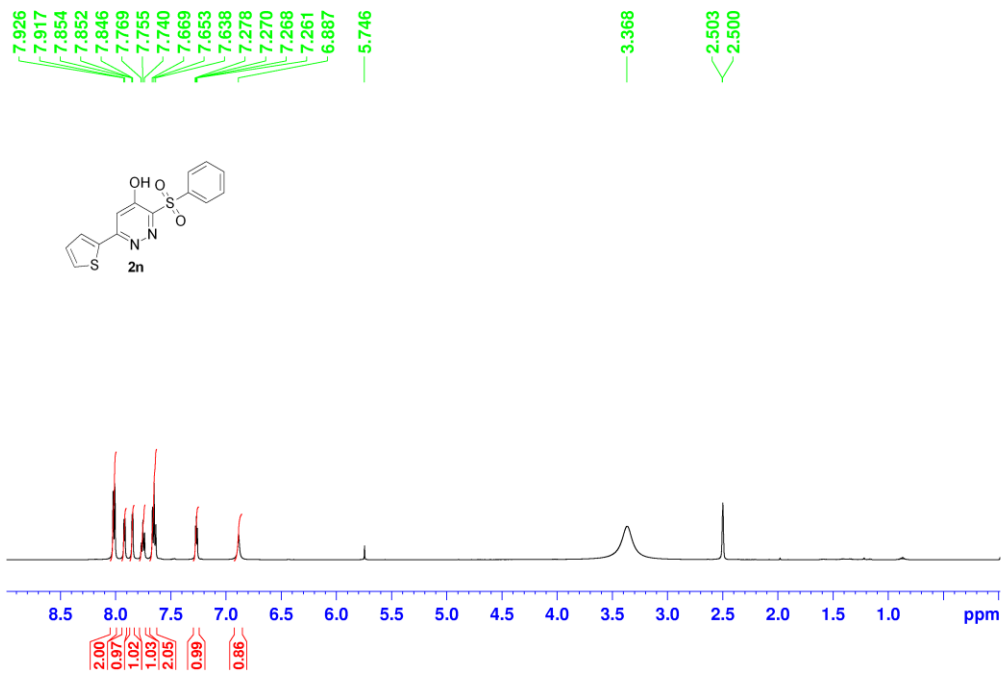

2n carbon spectrum (125 MHz) in DMSO-d6

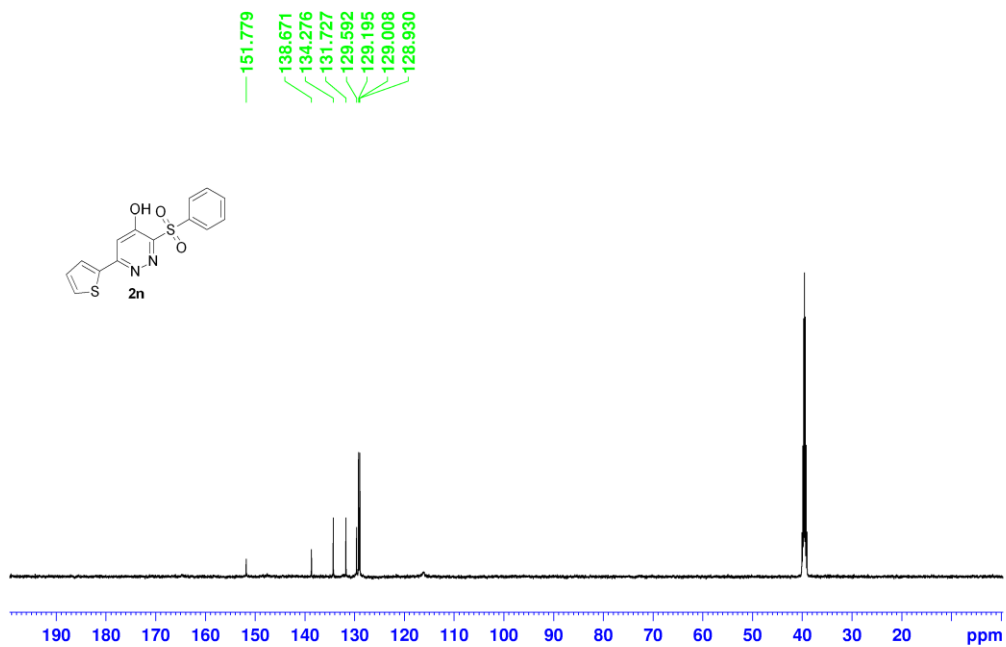

# LC/MS ANALYSIS

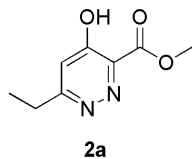

UV Detector: TIC

1.521e+2  
Range: 1.693e+2

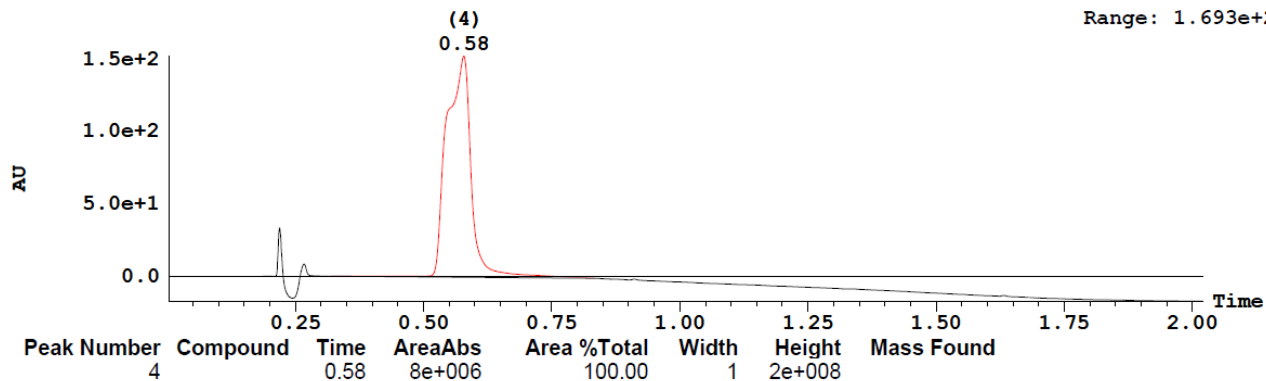

Peak ID Compound Time Mass Found  
4 0.58  
SAMPLE: 2:42 Combine (135:140) 1.1e+008

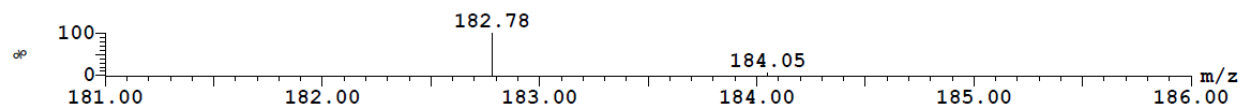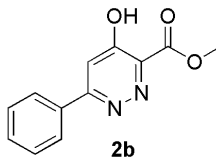

UV Detector: TIC

1.62e+2  
Range: 1.62e+2

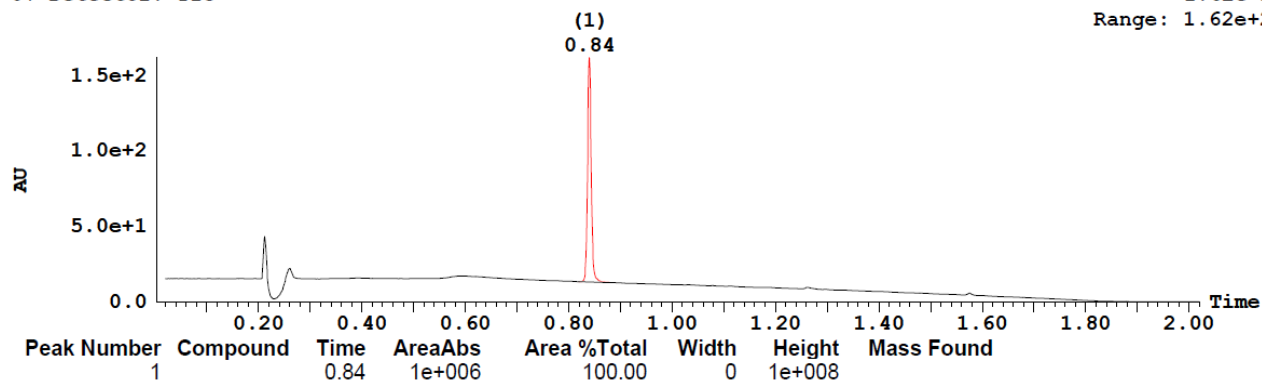

Peak ID Compound Time Mass Found  
1 0.84  
SAMPLE: 1:12 Combine (198:202) 4.3e+007

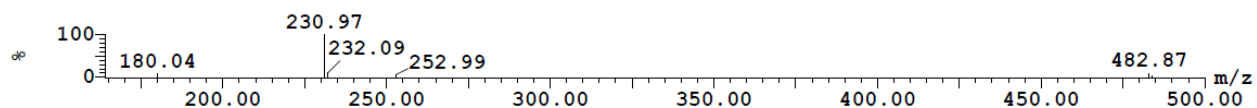

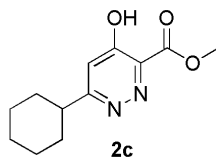

UV Detector: TIC

2.19e+2  
Range: 2.19e+2

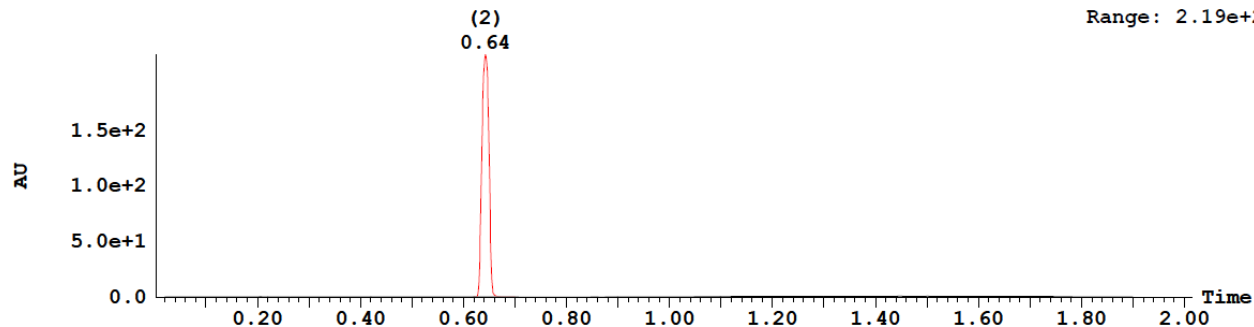

| Peak Number | Compound | Time | AreaAbs | Area %Total | Width | Height | Mass Found |
|-------------|----------|------|---------|-------------|-------|--------|------------|
| 2           |          | 0.64 | 3e+006  | 100.00      | 0     | 2e+008 |            |

Peak ID Compound Time Mass Found  
2 0.64

SAMPLE: 2:30 Combine (151:155)

1.2e+008

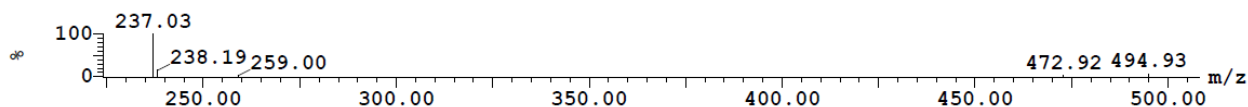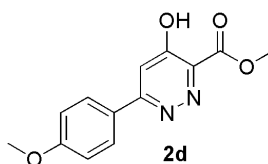

2: UV Detector: TIC

3.457e+2  
Range: 3.623e+2

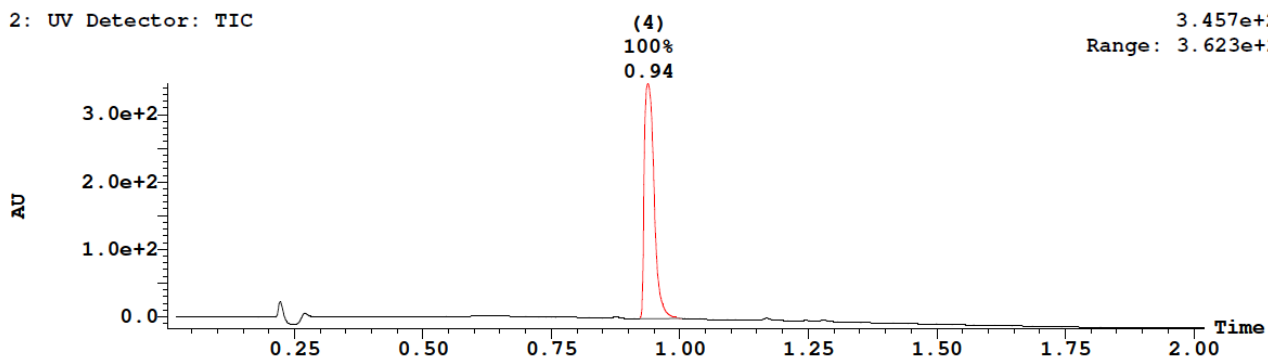

| Peak Number | Compound | Time | AreaAbs | Area %Total | Width | Height | Mass Found |
|-------------|----------|------|---------|-------------|-------|--------|------------|
| 4           |          | 0.94 | 8e+006  | 100.00      | 0     | 3e+008 |            |

Peak ID Compound Time Mass Found  
4 0.94

4: (Time: 0.94) Combine (220:225)

1: MS ES+  
1.2e+008

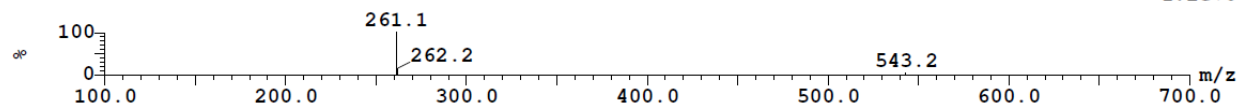

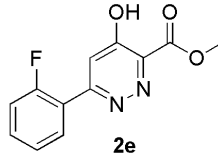

UV Detector: TIC

2.788e+2

Range: 2.956e+2

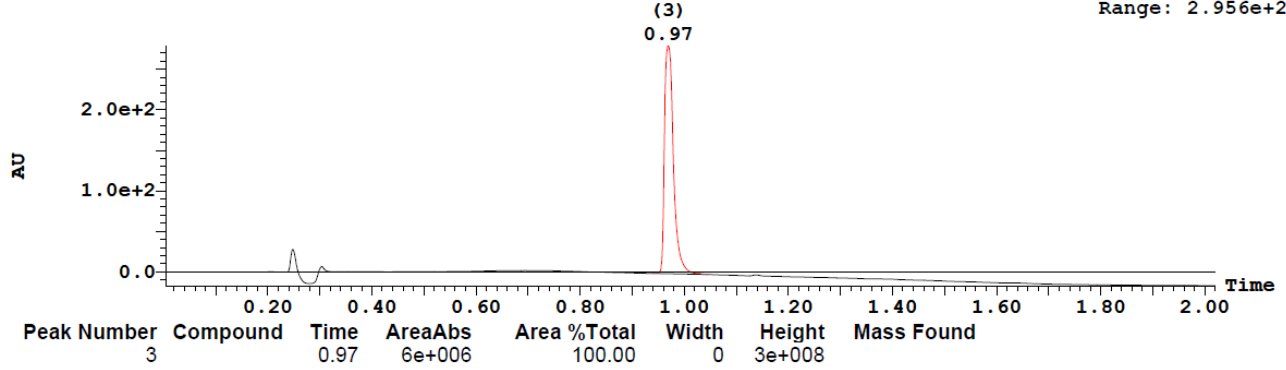

Peak ID Compound Time Mass Found

3 0.97

SAMPLE: 1:5 Combine (227:232) 8.3e+007

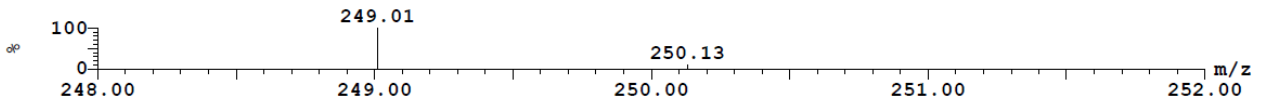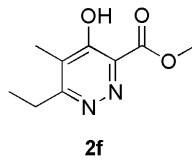

UV Detector: TIC

3.051e+2

Range: 3.22e+2

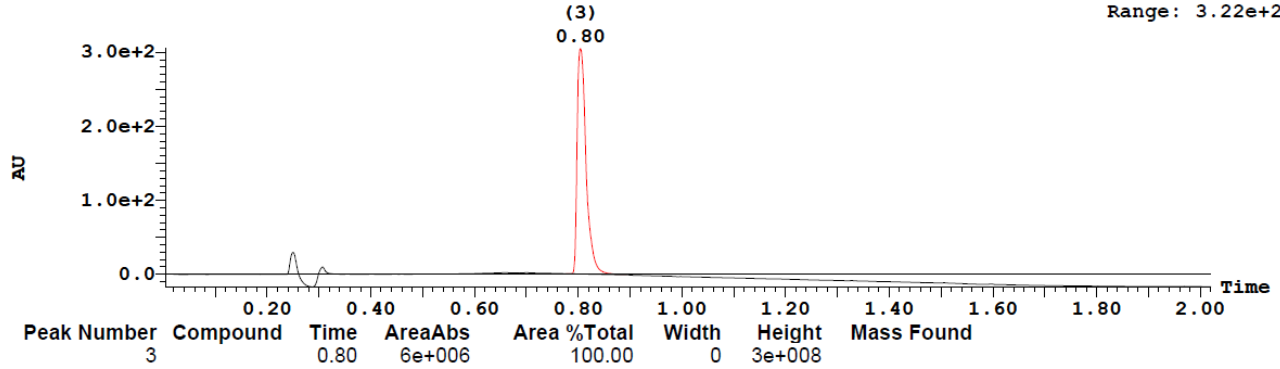

Peak ID Compound Time Mass Found

3 0.80

SAMPLE: 1:4 Combine (188:193) 1.1e+008

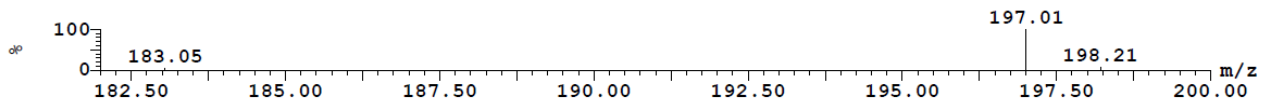

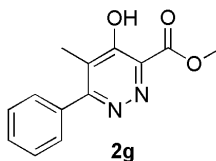

UV Detector: TIC

3.519e+2  
Range: 3.694e+2

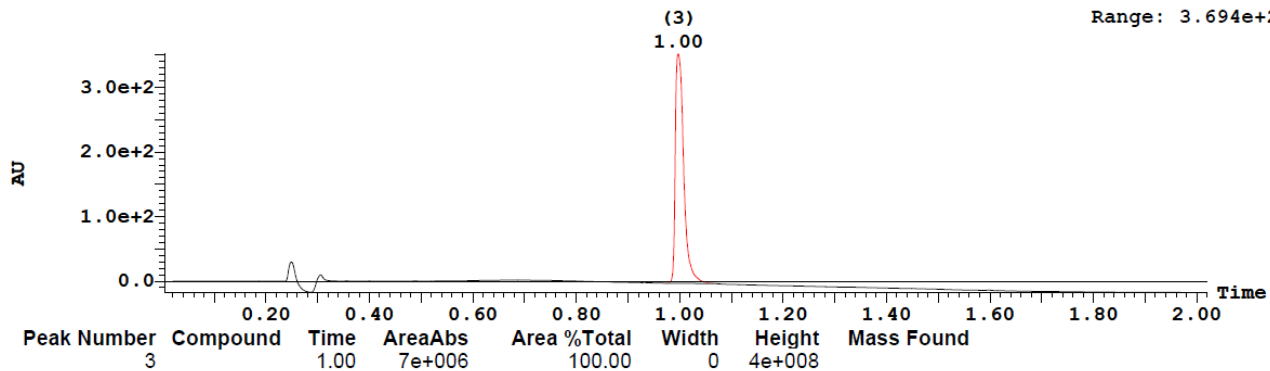

Peak ID Compound Time Mass Found  
3 1.00

SAMPLE: 1:5 Combine (234:239)

1.1e+008

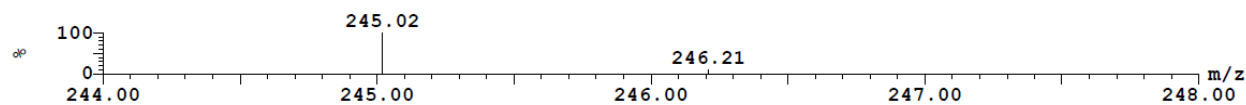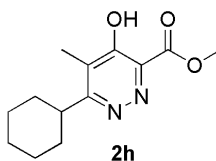

UV Detector: TIC

2.67e+2  
Range: 2.842e+2

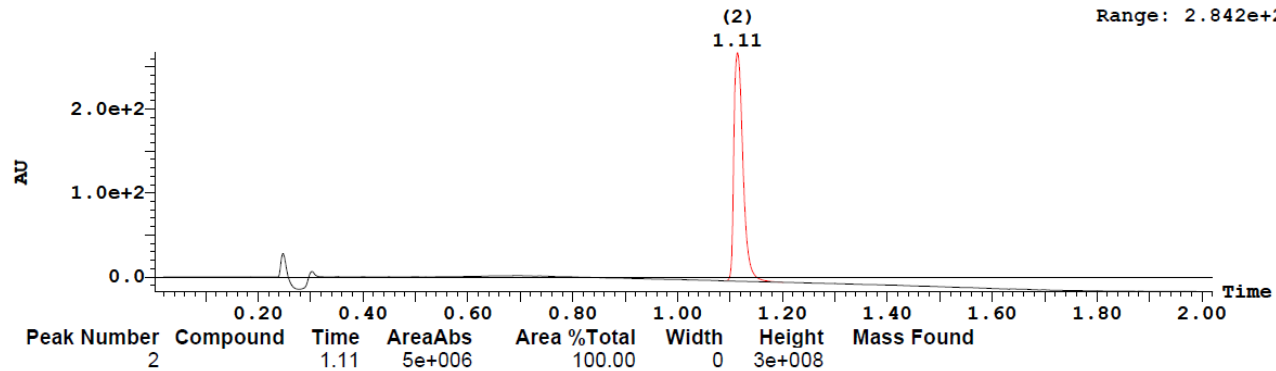

Peak ID Compound Time Mass Found  
2 1.11

SAMPLE: 1:6 Combine (262:267)

1.1e+008

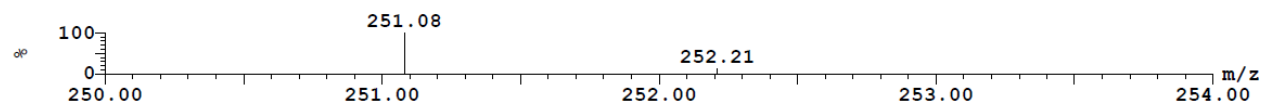

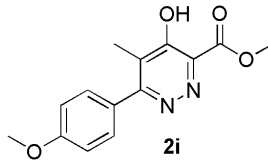

UV Detector: TIC

2.994e+2

Range: 3.166e+2

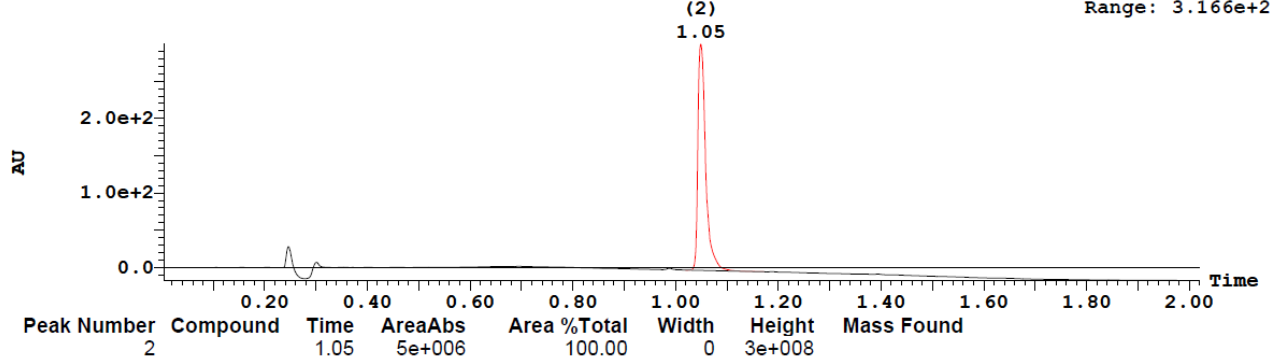

Peak ID Compound Time Mass Found

SAMPLE: 1:3 Combine (246:251)

9.8e+007

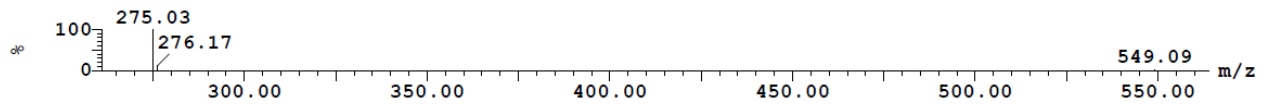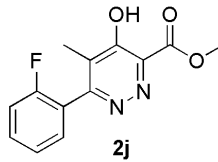

UV Detector: TIC

2.709e+2

Range: 2.875e+2

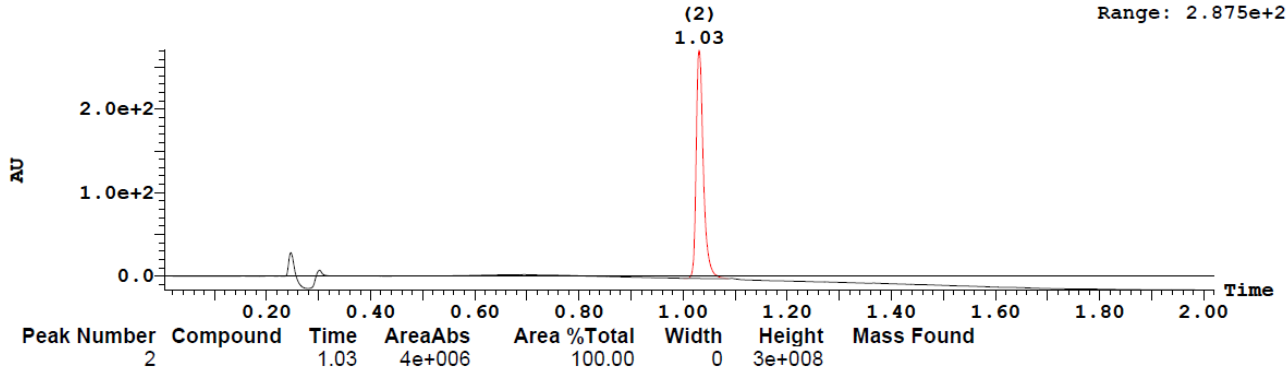

Peak ID Compound Time Mass Found

SAMPLE: 1:2 Combine (242:247)

8.0e+007

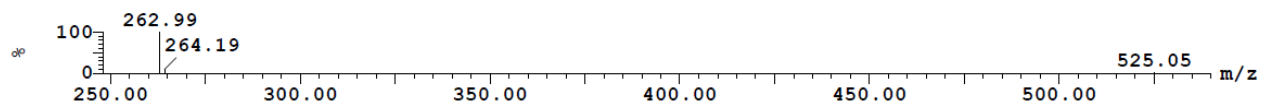

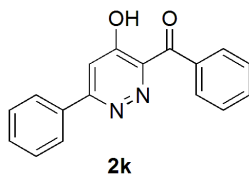

UV Detector: TIC

2.811e+2

Range: 2.982e+2

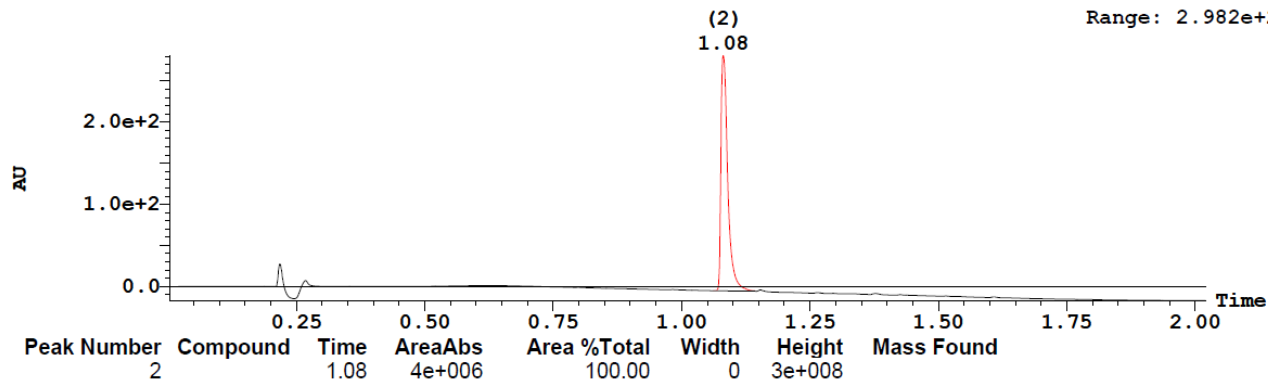

Peak ID Compound Time Mass Found

2 1.08

SAMPLE: 2:13 Combine (254:259)

5.8e+007

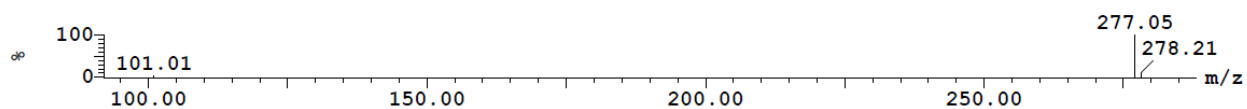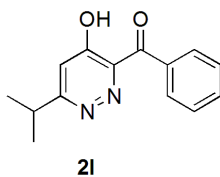

UV Detector: TIC

3.33e+2

Range: 3.499e+2

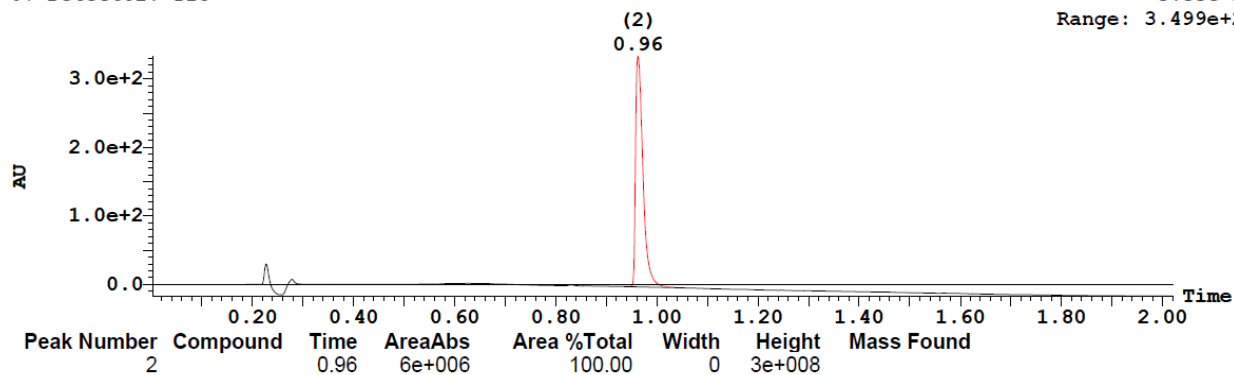

Peak ID Compound Time Mass Found

2 0.96

SAMPLE: 1:37 Combine (226:231)

1.1e+008

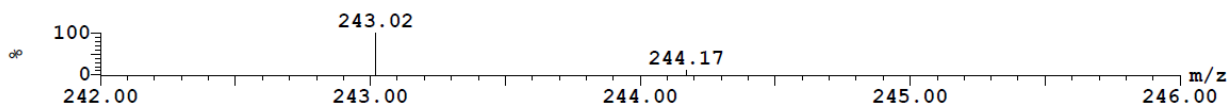

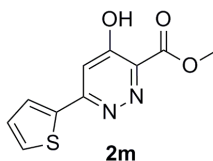

UV Detector: TIC

3.988e+2  
Range: 4.159e+2

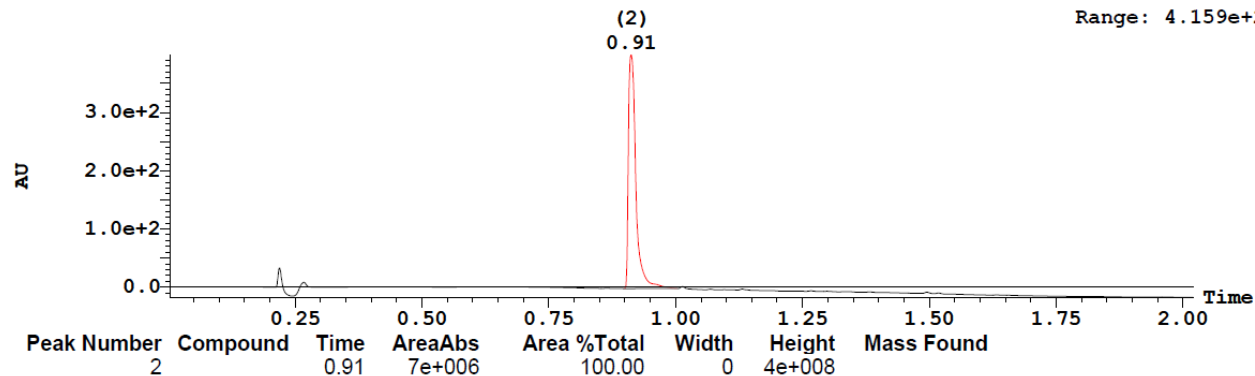

Peak ID Compound Time Mass Found  
2 0.91

SAMPLE: 2:41 Combine (214:219)

9.9e+007

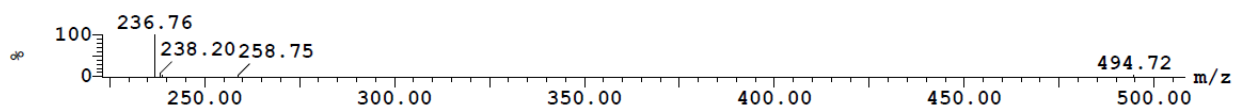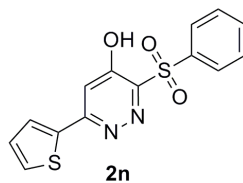

UV Detector: TIC

3.413e+2  
Range: 3.582e+2

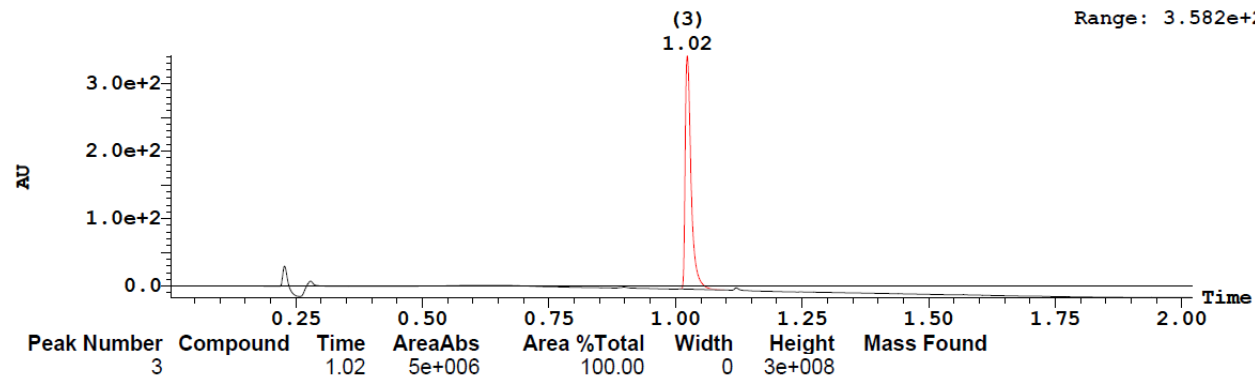

Peak ID Compound Time Mass Found  
3 1.02

SAMPLE: 1:36 Combine (240:245)

2.6e+007

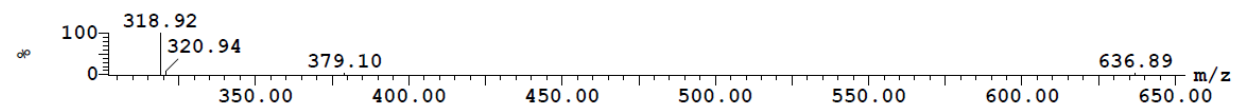



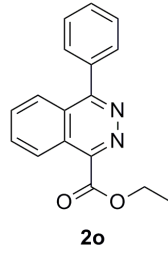

3: UV Detector: TIC

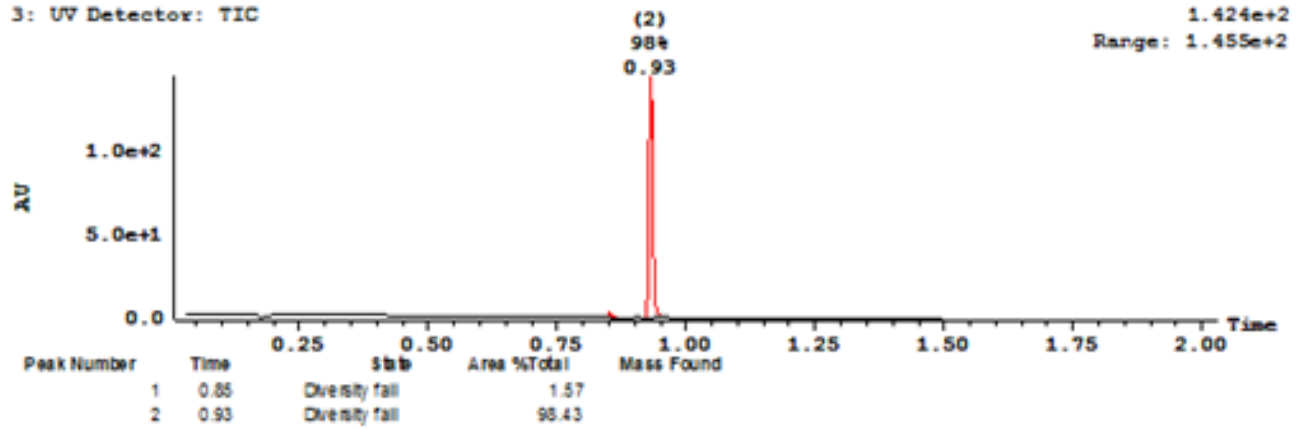

| Peak ID | Time | Mass Found | BPM | State          |
|---------|------|------------|-----|----------------|
| 2       | 0.93 |            | 279 | Diversity fail |

2: (Time: 0.93) Combine (54)

1:MS ES+  
3.2e+007

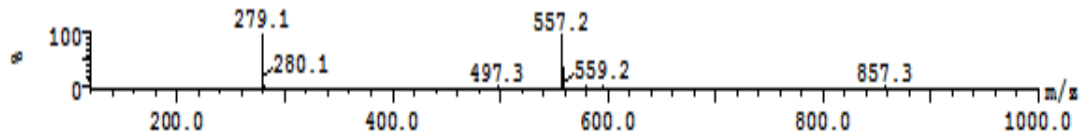

Supplement: c4ob01201a1.pdf [file c4ob01201a1.pdf]
